# Supplementary material
Source: ML conference proceedings conference paper supplement (https://openaccess.thecvf.com/content/WACV2024/html/Wu_HD-Fusion_Detailed_Text-to-3D_WACV_2024_paper.html)
Supplement: Supplementary file 1 [file Wu_HD-Fusion_Detailed_Text-to-3D_WACV_2024_supplemental.pdf]

# Supplementary material for “HD-Fusion: Detailed Text-to-3D Generation Leveraging Multiple Noise Estimation”

Jinbo Wu, Xiaobo Gao, Xing Liu, Zhengyang Shen, Chen Zhao,  
Haocheng Feng, Jingtuo Liu, Errui Ding  
Department of Computer Vision Technology (VIS), Baidu Inc., China  
{wujinbo01, gaoxiaobo, liuxing12, shenzhengyang01, zhaochen03,  
fenghaocheng, liujingtuo, dingerrui}@baidu.com

This document provides additional explanations about the proposed method and additional experimental results.

## A. Global and local consistency

We explain why a full-object prompt (e.g., Messi, full body) does not negatively affect local content (e.g., hands) generation when the proposed multiple noise estimation is applied. We found that pretrained Stable Diffusion automatically addresses this issue after the Color network reaches a certain stage of training. We therefore first train the network to a certain stage without the proposed multiple noise estimation, and then we activate it for continued training until completion in Stage 2 - Phase 2.

## B. Computational cost with high-resolution renderings

We report the training times for each stage in Table 1. It is observed that the proposed multiple noise estimation mechanism yields a significant improvement (see Fig. 6 in the main text) in performance at an acceptable additional cost of 21 minutes. We compare the training time of our full pipeline with the SOTAs’ in Table 2. Ours is faster than Magic3D’s and is competitive with Fantasia3D’s.

Table 1. Training on single GPU (A100). MNE denotes the proposed multiple noise estimation.

|               | Stage1   | Stage2 w/ MNE | Stage2 w/o MNE |
|---------------|----------|---------------|----------------|
| training time | ~ 40 min | ~ 65 min      | ~ 44 min       |

Table 2. Training time comparison on single GPU (A100).

|               | Ours     | Fantasia3D | Magic3D |
|---------------|----------|------------|---------|
| training time | ~ 1.75 h | ~ 2 h      | ~ 5 h   |

## C. More visual results

We provide more results in Figs. 1, 2, 3 on the following pages.

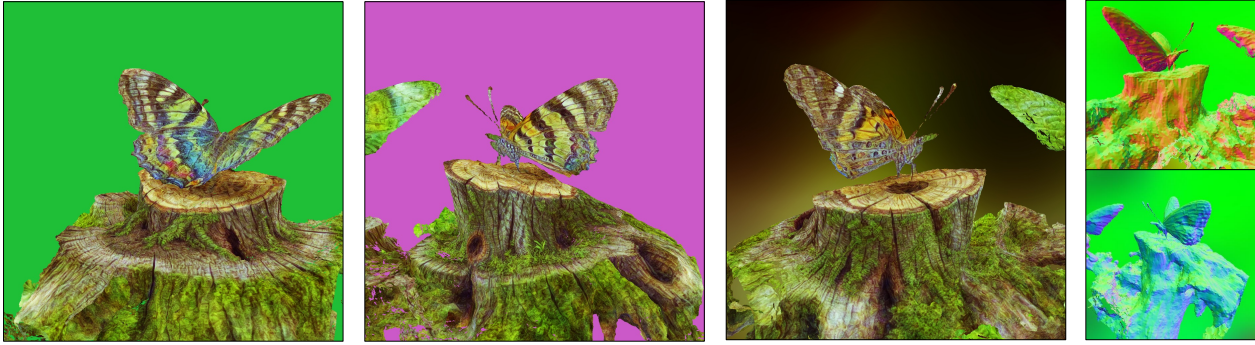

**Prompt:** A butterfly over a tree stump

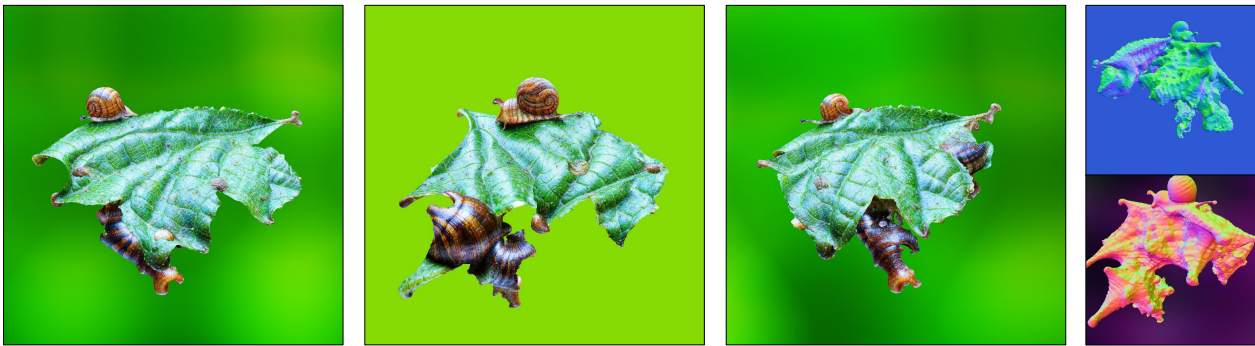

**Prompt:** A snail on a leaf

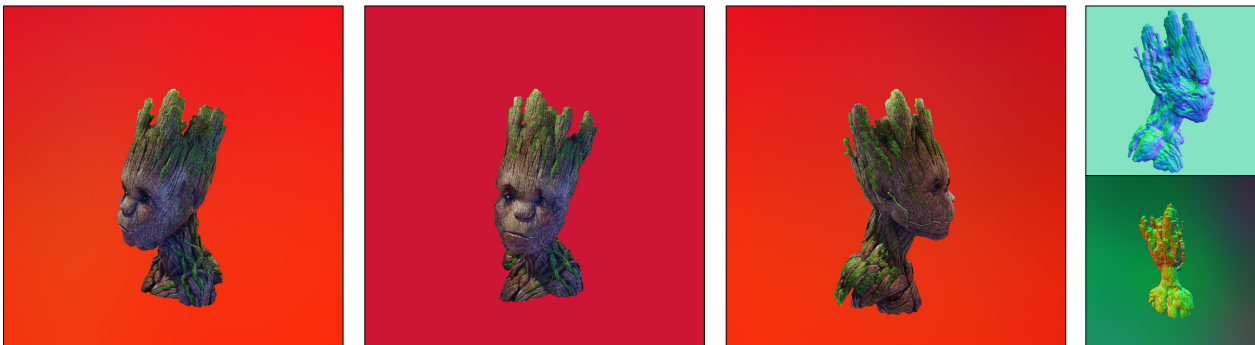

**Prompt:** A head of I am groot

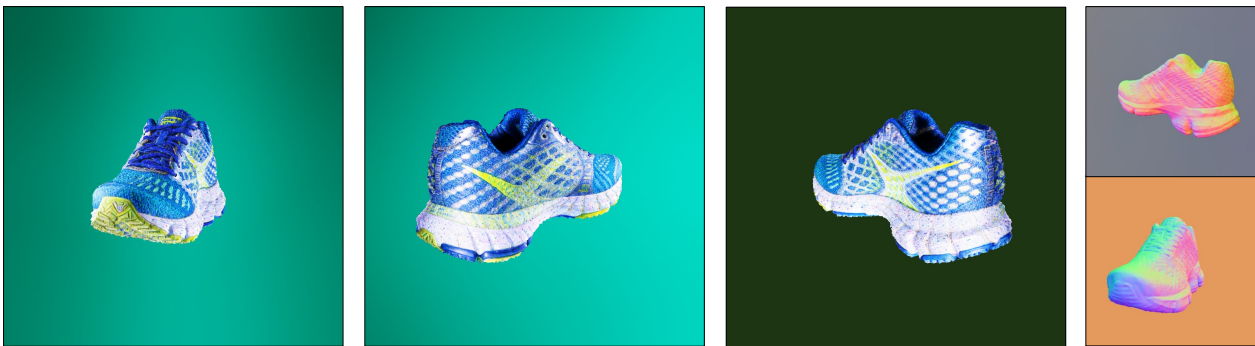

**Prompt:** A sport shoe

Figure 1. More results. We show them in multiple figures to see them clearly.

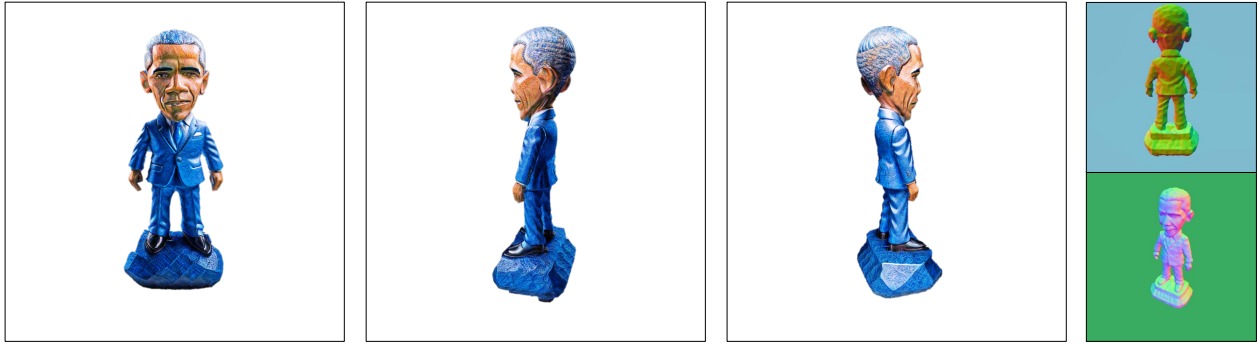

**Prompt:** An Obama figure, full body

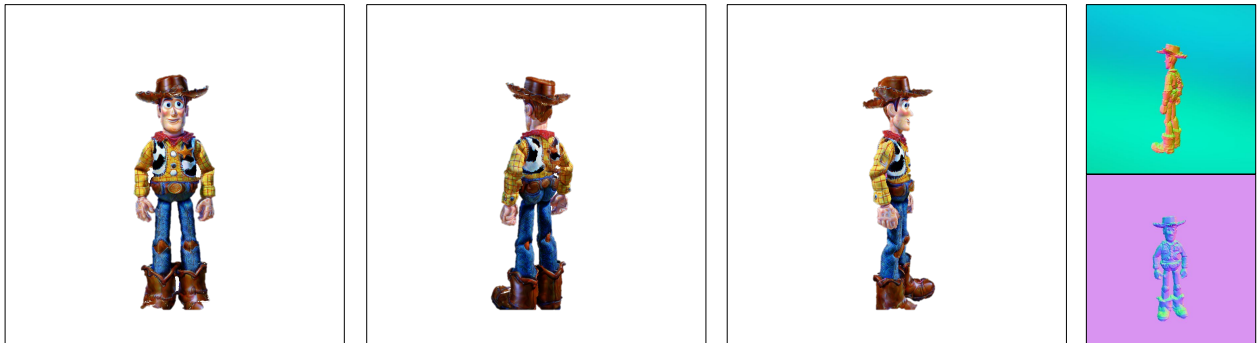

**Prompt:** Woody in toy story, full body

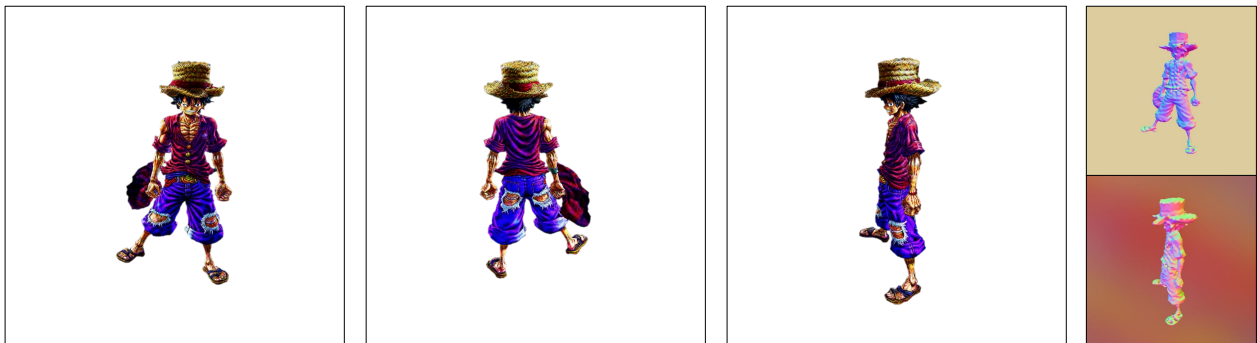

**Prompt:** Luffy, full body

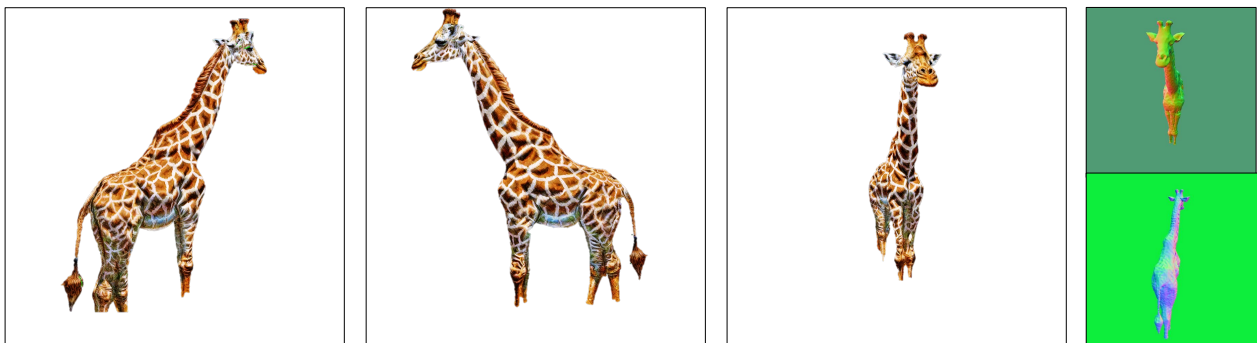

**Prompt:** A giraffe, full body

Figure 2. More results. We show them in multiple figures to see them clearly.

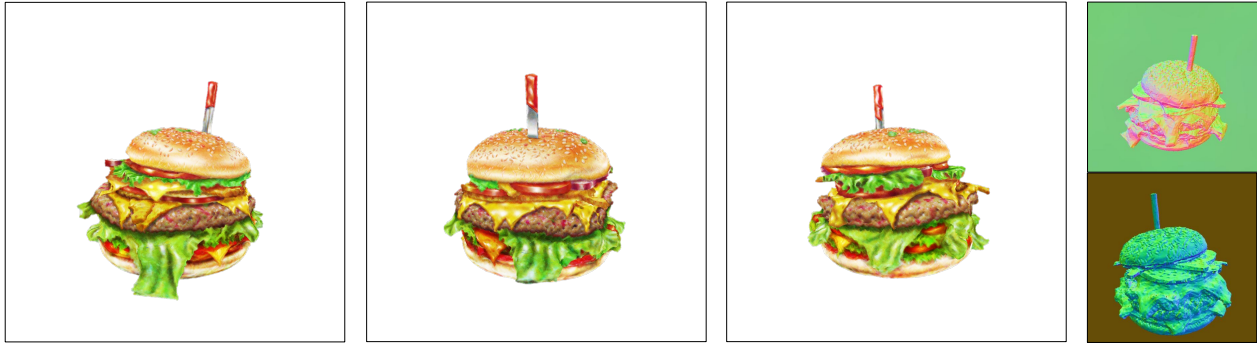

**Prompt:** A hamburger

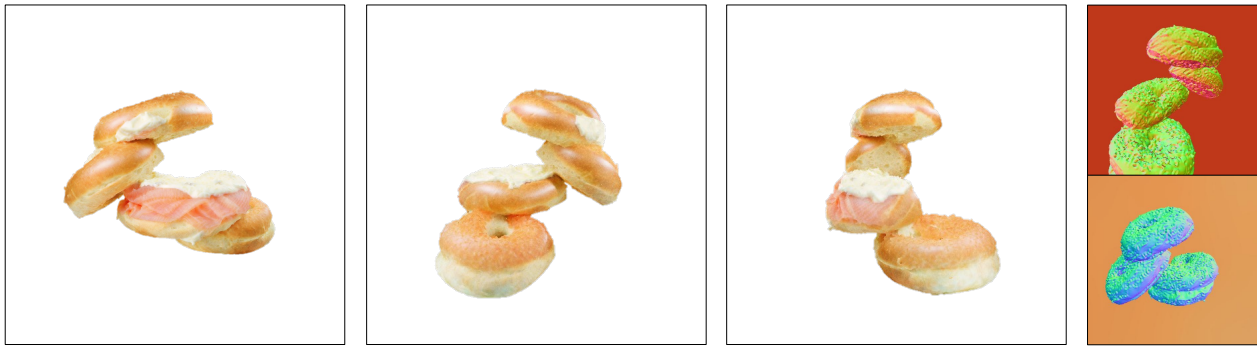

**Prompt:** Bagel filled with cream cheese and lox

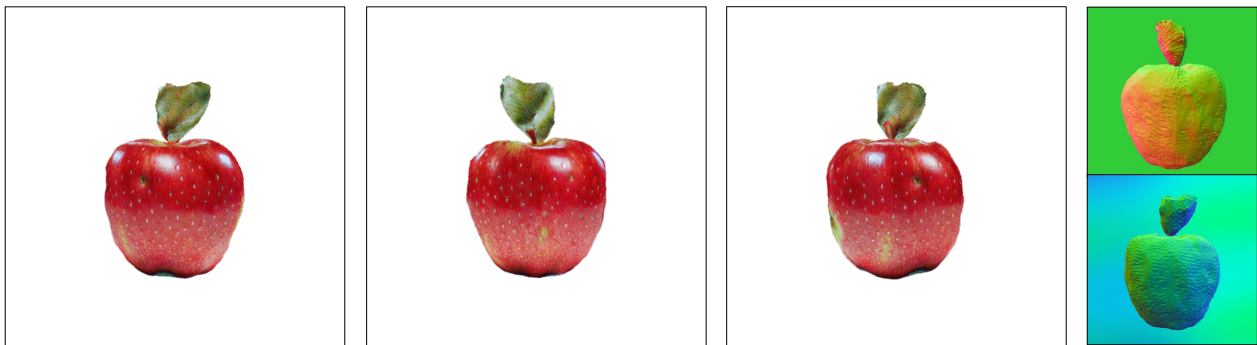

**Prompt:** A red apple

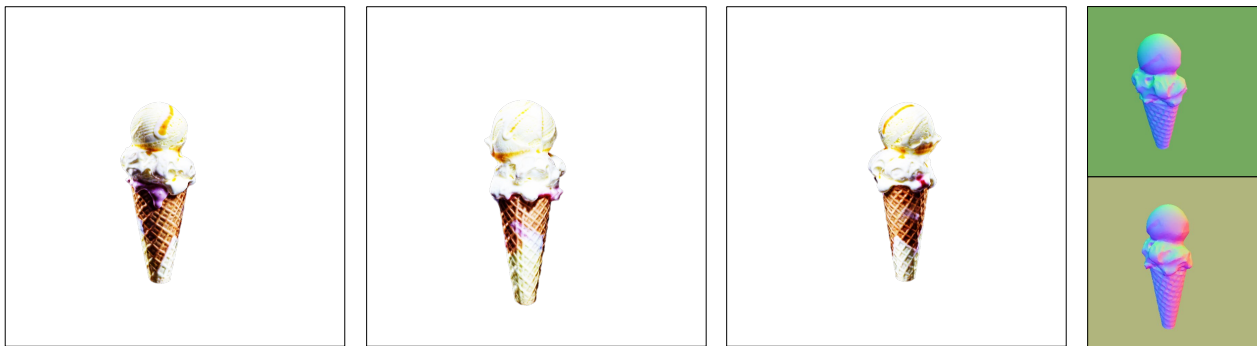

**Prompt:** An ice cream sundae

Figure 3. More results. We show them in multiple figures to see them clearly.
